# Supplementary material for: Evidence for Hitchhiking of Deleterious Mutations within the Human Genome
Source: PubMed Central journal article supplement (PMC3161959; doi:10.1371/journal.pgen.1002240), 2011-08-25
Supplement: pgen.1002240.s001.pdf [file pgen.1002240.s001.pdf]

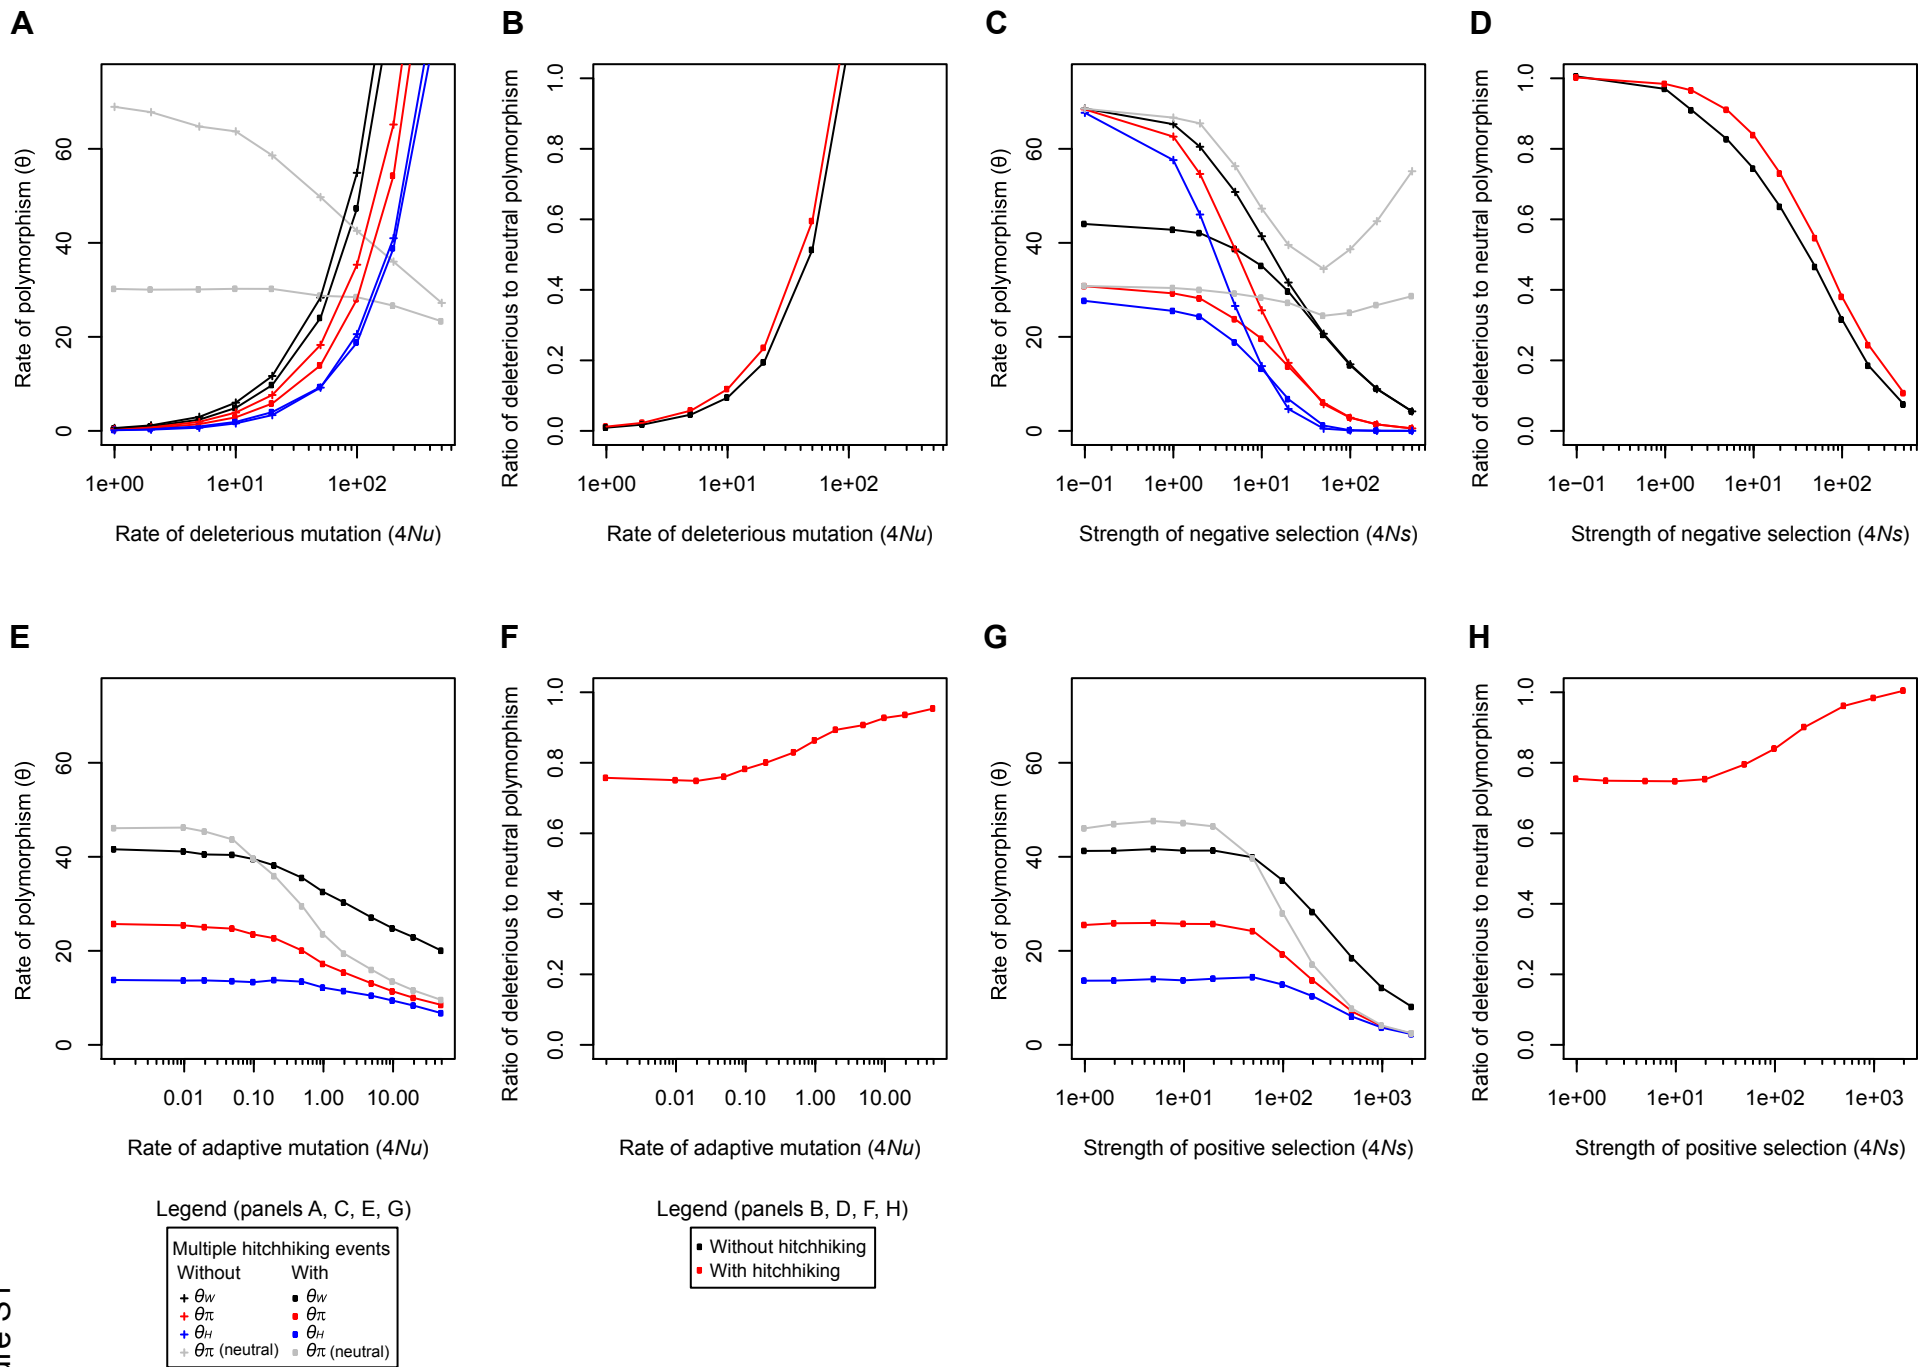

Figure S1

Figure S1. The effect of hitchhiking on neutral and deleterious polymorphism as a function of the rate and strength of advantageous and deleterious mutations. The rate of low, intermediate and high frequency deleterious polymorphism measured by  $\theta_W$ ,  $\theta_\pi$  and  $\theta_H$ , respectively, in the presence (squares) and absence (crosses) of multiple hitchhiking events (A, C, E, G). Average heterozygosity ( $\theta_\pi$ ) of neutral polymorphism is shown in gray. The ratio of deleterious to neutral polymorphism, measured by  $\theta_W$ , in the absence (black) and presence (red) of multiple hitchhiking events (B, D, F, H). Unless shown on the x-axis, all panels show the mean of 500 simulations for which  $4Nu_n = 70$ ,  $4Nu_d = 70$ ,  $4Ns_d = -10$ ,  $4Nu_a = 0.5$ ,  $4Ns_a = 100$  and  $4Nr = 100$ , where  $N$  is the population size,  $u$  is the mutation rate,  $s$  is the selection coefficient, and subscripts  $n$ ,  $a$  and  $d$  refer to neutral, advantageous and deleterious mutations.
