# Supplementary material for: Evidence for Hitchhiking of Deleterious Mutations within the Human Genome
Source: PubMed Central journal article supplement (PMC3161959; doi:10.1371/journal.pgen.1002240), 2011-08-25
Supplement: pgen.1002240.s003.pdf [file pgen.1002240.s003.pdf]

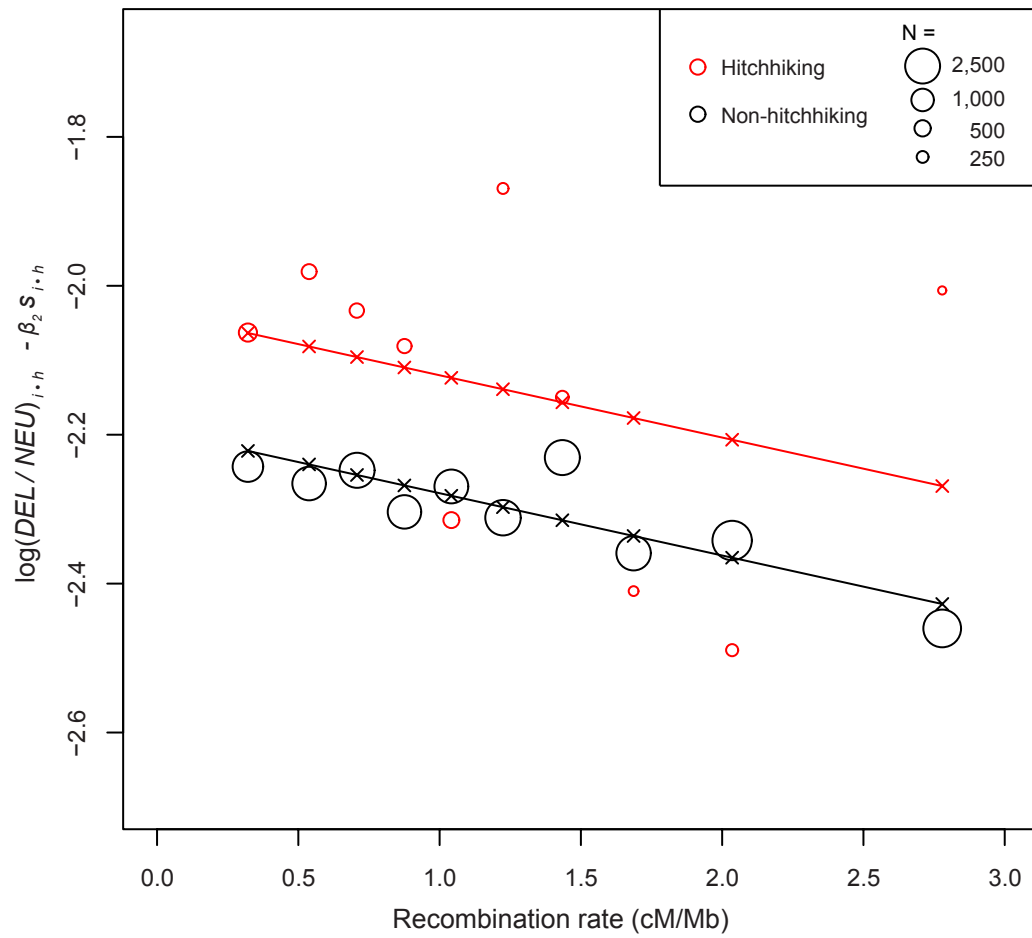

Figure S3. Hitchhiking regions are enriched for deleterious SNPs. The log ratio of deleterious to neutral SNPs (DEL/NEU) after correcting for the number of potentially deleterious sites is significantly higher for hitchhiking (red) compared to non-hitchhiking windows (black). The adjusted log ratio of DEL/NEU was marginalized over the number of GC nucleotides in a codon ( $j = 0, \dots, 3$ ) for presentation. The regression line  $\beta_0 + \beta_1 * r + \beta_3 * h$  is shown for hitchhiking ( $h = 1$ ) and non-hitchhiking ( $h = 0$ ) regions. Sample size is indicated by circle size.
