# Supplementary material for: Evidence for Hitchhiking of Deleterious Mutations within the Human Genome
Source: PLoS Genet. 2011 Aug 25;7(8):e1002240. doi: 10.1371/journal.pgen.1002240 (PMC3161959; doi:10.1371/journal.pgen.1002240)
Supplement: Table S2 — The ratio of deleterious to neutral SNPs in iHS population-specific hitchhiking regions. (XLS) [file pgen.1002240.s005.xls]

## Sheet: Table S2
Table S2. The ratio of deleterious to neutral SNPs in iHS population-specific hitchhiking regions.
Panel	iHS cutoff	Deleterious / Neutral		Fold increase in hitchhiking regions
		Hitchhiking	Non-hitchhiking
CEU	5%	351 / 719 (0.49)	5918 / 15869 (0.37)	1.31 ***
	1%	55 / 100 (0.55)	6214 / 16488 (0.38)	1.46 *
	0.25%	23 / 31 (0.74)	6246 / 16557 (0.38)	1.97 *
CHB+JPT	5%	213 / 579 (0.37)	4920 / 12998 (0.38)	0.97
	1%	43 / 107 (0.40)	5090 / 13470 (0.38)	1.06
	0.25%	8 / 11 (0.73)	5125 / 13566 (0.38)	1.93
YRI	5%	288 / 965 (0.30)	7175 / 22326 (0.32)	0.93
	1%	45 / 218 (0.21)	7418 / 23073 (0.32)	0.64
	0.25%	12 / 56 (0.21)	7451 / 23235 (0.32)	0.67
* One-sided Fisher exact test P < 0.05
