# Supplementary material for: Evidence for Hitchhiking of Deleterious Mutations within the Human Genome
Source: PLoS Genet. 2011 Aug 25;7(8):e1002240. doi: 10.1371/journal.pgen.1002240 (PMC3161959; doi:10.1371/journal.pgen.1002240)
Supplement: Table S5 — Disease or phenotype associated SNPs within hitchhiking regions. (XLS) [file pgen.1002240.s008.xls]

## Sheet: Table S5
Table S5. Disease or phenotype associated SNPs within hitchhiking regions.
Disease-associated SNPs	MAF 1	Disease	OMIM ID	Disease class	ENSEMBL ID 2	Gene Name 2	Gene description 2
rs11971167	0.003	Congenital bilateral absence of the vas deferens	602421		ENSG00000001626	CFTR	Cystic fibrosis transmembrane conductance regulator
rs7817	0.380167	Lung function	603502		ENSG00000006652	IFRD1	Interferon-related developmental regulator 1
rs12821256, rs642742	0.048, 0.440	Skin/hair/eye pigmentation 7	184745		ENSG00000049130	KITLG	Kit ligand precursor
rs361072	0.281667	Fasting glucose and insulin	602925	Energy metabolism	ENSG00000051382	PIK3CB	Phosphatidylinositol-4,5-bisphosphate 3-kinase catalytic subunit beta isoform
rs4988235	0.246333	Lactase persistence (regulate LCT expression)	601806		ENSG00000076003	MCM6	DNA replication licensing factor MCM6
rs11090865	0.117333	Mitochondrial modifier of deafness	610230		ENSG00000100416	TRMU	tRNA (5-methylaminomethyl-2-thiouridylate)-methyltransferase
rs6092	0.0851667	Plasminogen activator inhibitor-1 deficiency	173360		ENSG00000106366	SERPINE1	Plasminogen activator inhibitor 1 precursor
rs1408799	0.304667	Blue/nonblue eyes	115501		ENSG00000107165	TYRP1	5,6-dihydroxyindole-2-carboxylic acid oxidase precursor
rs1050565	0.2265	Non-APOE4 cases of Alzheimer disease	602403	Brain function	ENSG00000108578	BLMH	Bleomycin hydrolase
rs17690122, rs4143832	0.178, 0.271	Susceptibility to symptomatic infection of S. japonicum	147850		ENSG00000113525	IL5	Interleukin-5 precursor
rs1137100, rs1137101, rs8179183	0.416, 0.361, 0.098	Fasting glucose	601007	Energy metabolism	ENSG00000116678	LEPR	Leptin receptor precursor
rs17822931	0.349833	Variation in apocrine gland secretion	607040		ENSG00000121270	ABCC11	ATP-binding cassette transporter sub-family C member 11
rs2070729	0.3985	Age of onset of Graves disease	147575	Autoimmune	ENSG00000125347	IRF1	Interferon regulatory factor 1
rs1667394, rs12913832, rs916977	0.365, 0.264, 0.372	Skin/hair/eye pigmentation 1 (blue/nonblue eyes)	605837		ENSG00000128731	HERC2	Probable E3 ubiquitin-protein ligase HERC2
rs1800407, rs7495174, rs4778138, rs4778241	0.077, 0.295, 0.475, 0.484	Skin/hair/eye pigmentation 1 (blue/nonblue eyes)	611409		ENSG00000104044	OCA2	P protein (Melanocyte-specific transporter protein)
rs2488457, rs2476601	0.276, 0.041	Insulin-dependent diabetes mellitus	600716	Autoimmune	ENSG00000134242	PTPN22	Tyrosine-protein phosphatase non-receptor type 22
rs3827760	0.289833	Hair morphology 1 (hair thickness)	604095		ENSG00000135960	EDAR	Tumor necrosis factor receptor superfamily member EDAR precursor
rs13277113	0.356833	Systemic lupus erythematosus	191305	Autoimmune	ENSG00000136573	BLK	Tyrosine-protein kinase BLK
rs3816873	0.1945	Protection against metabolic syndrome	157147	Energy metabolism	ENSG00000138823	MTTP	Microsomal triglyceride transfer protein large subunit precursor
rs12735723	0.009	Homozygous variegate porphyria	600923		ENSG00000143224	PPOX	Protoporphyrinogen oxidase
rs11887534	0.0451667	Gallbladder disease 4	605460		ENSG00000143921	ABCG8	ATP-binding cassette sub-family G member 8 (Sterolin-2)
rs3737787	0.175333	Susceptibility to familial combined hyperlipidemia	191523	Energy metabolism	ENSG00000158773	USF1	Upstream stimulatory factor 1 (Major late transcription factor 1)
rs5030980	0.027	Late-onset obesity	602311	Energy metabolism	ENSG00000159723	AGRP	Agouti-related protein precursor
rs140593	0.00566667	Marfan syndrome	134797		ENSG00000166147	FBN1	Fibrillin-1 precursor
rs9923231, rs9934438	0.449, 0.449	Warfarin sensitivity	608547		ENSG00000167397	VKORC1	Vitamin K epoxide reductase complex subunit 1
rs1031771, rs1031772	0.278, 0.212	Airway hyperresponsiveness	603888		ENSG00000170745	KCNS3	Potassium voltage-gated channel subfamily S member 3
rs6133	0.255667	Susceptibility to atopy	173610	Immune hypersensitivity	ENSG00000174175	SELP	P-selectin precursor
rs839523, rs707284, rs7598440	0.460, 0.471, 0.387	Schizophrenia	600543	Brain function	ENSG00000178568	ERBB4	Receptor tyrosine-protein kinase erbB-4 precursor
rs1426654	0.341333	Skin/hair/eye pigmentation 4 (fair/dark skin)	609802		ENSG00000188467	SLC24A5	Sodium/potassium/calcium exchanger 5 precursor
rs283413, rs1693482, rs698	0.003, 0.197, 0.195	Susceptibility to Parkinson disease, Protection against alcohol dependence	103730	Brain function	ENSG00000196616	ADH1C	Alcohol dehydrogenase 1C
rs1229984, rs2066702, rs1042026, rs1573496, rs3762894, rs1230165	0.253, 0.091, 0.366, 0.033, 0.351, 0.055	Protection against alcohol dependence, Protection against alcohol-related aerodigestive tract cancer, Alcohol consumption	103720	Brain function	ENSG00000196616	ADH1B	Alcohol dehydrogenase 1B
rs8176058	0.00766667	KELL K/k blood group	110900		ENSG00000197993	KEL	Kell blood group glycoprotein
rs13119723	0.037	Celiac disease	611565	Autoimmune	ENSG00000138688	KIAA1109	KIAA1109
rs1154468, rs894363, rs1154461, rs1154470	0.199, 0.222, 0.212, 0.202	Early stages of alcohol metabolism	103780
rs3752462	0.385	Orofacial cleft 1	119530
rs3847953, rs933399	0.327, 0.325	Major affective disorder 1	125480	Brain function
rs1111875, rs7923837	0.405, 0.390	Type 2 diabetes	125853	Energy metabolism
rs314277	0.203	Relative length of fingers, Stature QTL 1, Age at menarche QTL 2	136100, 606255, 612882
rs1990760	0.294	Immunoglobulin A deficiency 1, Graves disease, Insulin-dependent diabetes mellitus 19	137100, 275000, 610155	Autoimmune
rs4987667, rs4987682	0.234, 0.240	Calcium oxalate nephrolithiasis (kidney stones)	167030
rs3789604	0.142	Psoriasis susceptibility 1	177900	Autoimmune
rs2736340	0.361	Rheumatoid arthritis	180300	Autoimmune
rs3184504	0.151	Celiac disease, Insulin-dependent diabetes mellitus, Susceptibility to celiac disease 13, Insulin-dependent diabetes mellitus 20	212750, 222100, 612011, 612520	Autoimmune
rs1992093	0.481	Cranioectodermal dysplasia 1	218330
rs17696736	0.123	Insulin-dependent diabetes mellitus, Insulin-dependent diabetes mellitus 20	222100, 612520	Autoimmune
rs9286879	0.484	Geroderma osteodysplasticum (Walt Disney dwarfism)	231070
rs16853571	0.087	Inflammatory bowel disease 1	266600	Autoimmune
rs3782179, rs4474514, rs1508595, rs995030	0.450, 0.450, 0.425, 0.433	Testicular tumors	273300
rs11079657	0.456	Susceptibility to Asthma, Body mass index QTL 15	600807, 612967	Immune hypersensitivity, Energy metabolism
rs2815752	0.303	Obesity	601665	Energy metabolism
rs1876487	0.451	Autosomal dominant Parkinson disease 3	602404	Brain function
rs4688761	0.384	Atopic dermatitis	603165	Immune hypersensitivity
rs10508503	0.029	Body mass index QTL 8	603188	Energy metabolism
rs11886047	0.133	Susceptibility to microvascular complications of diabetes 1	603933
rs7759938	0.404	Stature QTL, Age at menarche QTL 2	606255, 612882
rs6596075, rs2188962, rs12521868	0.281, 0.132, 0.132	Inflammatory bowel disease 5	606348	Autoimmune
rs967582, rs3902720	0.446, 0.494	Parkinson disease 10	606852	Brain function
rs2271293	0.065	High density lipoprotein cholesterol level QTL 3	607687	Energy metabolism
rs10883866	0.113	Schizophrenia 11	608078	Brain function
rs2772577	0.129	Alzheimer disease 11	609790	Brain function
rs1547251	0.439	Split-hand/foot malformation with long bone deficiency 2	610685
rs1028936, rs1329650	0.303, 0.369	Smoking QTL 1	611003	Brain function
rs720225	0.43	Autosomal recessive mental retardation 6	611092	Brain function
rs2109075	0.496	Autosomal recessive mental retardation 11	611097	Brain function
rs653178	0.15	Susceptibility to celiac disease 13	612011	Autoimmune
rs6060369, rs6060373, rs4911494, rs6088813	0.457, 0.456, 0.432, 0.431	Stature QTL 14	612228
rs3197999, rs9858213, rs9858542	0.183, 0.161, 0.178	Inflammatory bowel disease 12	612241	Autoimmune
rs7812879	0.188	Susceptibility to systemic lupus erythematosus 12	612254	Autoimmune
rs4821480, rs4821481, rs2032487	0.274, 0.263, 0.378	Susceptibility to focal segmental glomerulosclerosis 4 (nondiabetic end-stage renal disease)	612551
rs20541	0.237	Psoriasis susceptibility 11	612599	Autoimmune
rs6534347	0.402	Insulin-dependent diabetes mellitus 23	612622	Autoimmune
rs987525	0.309	Orofacial cleft 12	612858
rs314276, rs314280, rs4946651, rs314262, rs314263, rs369065	0.332, 0.476, 0.475, 0.482, 0.303, 0.380	Age at menarche QTL 2	612882
rs10946808	0.369	Stature QTL 18	612892
rs228875, rs228883, rs1005651	0.379, 0.324, 0.314	Body mass index QTL 15	612967	Energy metabolism
rs968652	0.37	Autosomal recessive mental retardation 13	613192	Brain function
rs3806932	0.469	Eosinophilic esophagitis 2	613412
rs718883	0.178	Forsythe-Wakeling syndrome	613606
The hitchhiking regions are defined by the overlap of three or more tests of selection.
1 Average minor allele frequency across CEU, CHB+JPT, and YRI in HapMap Phase II+III.
2 OMIM genes linked with disease-associated SNPs. SNPs linked with OMIM phenotypes are left blank.
