# Supplementary material for: Evidence for Hitchhiking of Deleterious Mutations within the Human Genome
Source: PLoS Genet. 2011 Aug 25;7(8):e1002240. doi: 10.1371/journal.pgen.1002240 (PMC3161959; doi:10.1371/journal.pgen.1002240)
Supplement: Table S6 — Genes in hitchhiking regions with deleterious SNPs. (XLS) [file pgen.1002240.s009.xls]

## Sheet: Table S6
Table S6. Genes in hitchhiking regions with deleterious SNPs.
ENSEMBL ID	Number of deleterious SNPs	Gene Name	Gene Description
ENSG00000001626	6	CFTR	Cystic fibrosis transmembrane conductance regulator
ENSG00000003137	3	CYP26B1	Cytochrome P450 26B1
ENSG00000005844	2	ITGAL	Integrin alpha-L precursor
ENSG00000006652	1	IFRD1	Interferon-related developmental regulator 1
ENSG00000009830	2	POMT2	Protein O-mannosyl-transferase 2
ENSG00000012504	1	NR1H4	Bile acid receptor
ENSG00000015479	2	MATR3	Matrin-3
ENSG00000021461	1	CYP3A43	Cytochrome P450 3A43
ENSG00000023608	1	SNAPC1	snRNA-activating protein complex subunit 1
ENSG00000028528	2	SNX1	Sorting nexin-1
ENSG00000034053	1	APBA2	Amyloid beta A4 precursor protein-binding family A member 2
ENSG00000035664	2	DAPK2	Death-associated protein kinase 2
ENSG00000048991	4	R3HDM1	R3H domain-containing protein 1
ENSG00000051382	1	PIK3CB	Phosphatidylinositol-4,5-bisphosphate 3-kinase catalytic subunit beta isoform
ENSG00000052126	1	PLEKHA5	Pleckstrin homology domain-containing family A member 5
ENSG00000052795	2	NP_065891.1	Folliculin interacting protein 2
ENSG00000053770	4	C14orf108	Uncharacterized
ENSG00000055163	2	CYFIP2	Cytoplasmic FMR1-interacting protein 2
ENSG00000056050	2	C4orf27	Uncharacterized
ENSG00000057468	1	MSH4	MutS protein homolog 4
ENSG00000058600	1	POLR3E	DNA-directed RNA polymerase III subunit RPC5
ENSG00000060718	4	COL11A1	Collagen alpha-1(XI) chain precursor
ENSG00000064042	1	LIMCH1	LIM and calponin homology domains 1
ENSG00000065413	1	ANKRD44	Ankyrin repeat domain-containing protein 44
ENSG00000067208	2	EVI5	Ecotropic viral integration site 5 protein homolog
ENSG00000068097	6	HEATR6	HEAT repeat containing 6
ENSG00000069329	3	VPS35	Vacuolar protein sorting-associated protein 35
ENSG00000069712	2	KIAA1107
ENSG00000069956	1	MAPK6	Mitogen-activated protein kinase 6
ENSG00000069966	1	GNB5	Guanine nucleotide-binding protein subunit beta 5
ENSG00000070367	3	EXOC5	Exocyst complex component 5
ENSG00000071205	2	ARHGAP10	Rho GTPase activating protein 10
ENSG00000072121	2	ZFYVE26	zinc finger, FYVE domain containing 26
ENSG00000072832	3	CRMP1	Dihydropyrimidinase-related protein 1
ENSG00000072840	3	EVC	Ellis-van Creveld syndrome protein
ENSG00000074054	1	CLASP1	CLIP-associating protein 1
ENSG00000074410	1	CA12	Carbonic anhydrase 12 precursor
ENSG00000074803	2	SLC12A1	Solute carrier family 12 member 1
ENSG00000075234	3	NP_060401.2	OTTHUMP00000028646
ENSG00000075275	4	CELSR1	Cadherin EGF LAG seven-pass G-type receptor 1 precursor
ENSG00000076003	1	MCM6	DNA replication licensing factor MCM6
ENSG00000077063	1	CTTNBP2	Cortactin-binding protein 2
ENSG00000077327	1	SPAG6	Sperm-associated antigen 6
ENSG00000078098	3	FAP	Seprase
ENSG00000078269	1	SYNJ2	Synaptojanin-2
ENSG00000079435	2	LIPE	Hormone-sensitive lipase
ENSG00000079739	1	PGM1	Phosphoglucomutase-1
ENSG00000081019	1	RSBN1	round spermatid basic protein 1
ENSG00000081026	1	MAGI3	membrane-associated guanylate kinase-related 3
ENSG00000081320	1	STK17B	Serine/threonine-protein kinase 17B
ENSG00000082258	1	CCNT2	Cyclin-T2
ENSG00000083642	2	PDS5B	Androgen-induced proliferation inhibitor
ENSG00000084676	1	NCOA1	Nuclear receptor coactivator 1
ENSG00000085377	1	PREP	Prolyl endopeptidase
ENSG00000087077	1	TRIP6	Thyroid receptor-interacting protein 6
ENSG00000087087	1	ARS2_HUMAN	Arsenite-resistance protein 2
ENSG00000088340	7	NR_001442.2	fer-1-like 4
ENSG00000089234	3	BRAP	BRCA1-associated protein
ENSG00000089248	1	ERP29	Endoplasmic reticulum protein ERp29 precursor
ENSG00000091583	2	APOH	Beta-2-glycoprotein 1 precursor
ENSG00000092847	1	EIF2C1	Eukaryotic translation initiation factor 2C 1
ENSG00000092850	4	TEKT2	Tektin-2
ENSG00000092853	3	CLSPN	Claspin
ENSG00000095596	1	CYP26A1	Cytochrome P450 26A1
ENSG00000096872	1	IFT74	Intraflagellar transport 74 homolog
ENSG00000099377	1	HSD3B7	3 beta-hydroxysteroid dehydrogenase type 7
ENSG00000099381	2	SETD1A	Histone-lysine N-methyltransferase, H3 lysine-4 specific SET1
ENSG00000100154	3	TTC28	Tetratricopeptide repeat protein 28
ENSG00000100336	1	APOL4	Apolipoprotein-L4 precursor
ENSG00000100416	1	TRMU	tRNA (5-methylaminomethyl-2-thiouridylate)-methyltransferase
ENSG00000100577	3	GSTZ1	Maleylacetoacetate isomerase
ENSG00000100593	1	THSD3	thrombospondin, type I domain containing 3 isoform 2
ENSG00000100596	1	SPTLC2	Serine palmitoyltransferase 2
ENSG00000100601	1	ALKBH1	Alkylated DNA repair protein alkB homolog 1
ENSG00000100612	1	DHRS7	Dehydrogenase/reductase SDR family member 7 precursor
ENSG00000102189	1	EEA1	Early endosome antigen 1
ENSG00000102890	3	ELMO3	Engulfment and cell motility protein 3
ENSG00000102893	4	PHKB	Phosphorylase b kinase regulatory subunit beta
ENSG00000102901	2	CENPT	Centromere protein T
ENSG00000102904	2	TSNAXIP1	translin-associated factor X interacting protein 1
ENSG00000102910	1	LONP2	Peroxisomal Lon protease homolog 2
ENSG00000103319	4	EEF2K	Elongation factor 2 kinase
ENSG00000103429	2	BFAR	Bifunctional apoptosis regulator
ENSG00000103642	1	LACTB	Serine beta-lactamase-like protein LACTB, mitochondrial precursor
ENSG00000103657	12	HERC1	guanine nucleotide exchange factor p532
ENSG00000104044	5	OCA2	P protein
ENSG00000104177	2	MYEF2	Myelin expression factor 2
ENSG00000104413	2	RBM35A	RNA-binding protein 35A
ENSG00000104637	1	PINX1_HUMAN	Pin2-interacting protein X1
ENSG00000104643	1	MTMR9	Myotubularin-related protein 9
ENSG00000105429	1	MEGF8	Multiple epidermal growth factor-like domains 8
ENSG00000105732	1	ZNF574	Zinc finger protein 574
ENSG00000106100	2	NOD1	Nucleotide-binding oligomerization domain-containing protein 1
ENSG00000106123	1	EPHB6	Ephrin type-B receptor 6 precursor
ENSG00000106245	1	BUD31	Protein BUD31 homolog
ENSG00000106246	1	PTCD1	Pentatricopeptide repeat protein 1
ENSG00000106384	1	MOGAT3	2-acylglycerol O-acyltransferase 3
ENSG00000106397	1	PLOD3	Procollagen-lysine,2-oxoglutarate 5-dioxygenase 3 precursor
ENSG00000107099	5	DOCK8	Dedicator of cytokinesis protein 8
ENSG00000107165	1	TYRP1	5,6-dihydroxyindole-2-carboxylic acid oxidase precursor
ENSG00000107745	1	CBARA1	calcium binding atopy-related autoantigen 1
ENSG00000108423	1	TUBD1	Tubulin delta chain
ENSG00000108576	1	SLC6A4	Sodium-dependent serotonin transporter
ENSG00000108578	1	BLMH	Bleomycin hydrolase
ENSG00000109133	2	TMEM33	Transmembrane protein 33
ENSG00000110448	2	CD5	T-cell surface glycoprotein CD5 precursor
ENSG00000110697	1	PITPNM1	Membrane-associated phosphatidylinositol transfer protein 1
ENSG00000110711	1	AIP	AH receptor-interacting protein
ENSG00000111249	1	CUTL2	Homeobox protein cut-like 2
ENSG00000111252	1	SH2B3	SH2B adapter protein 3
ENSG00000111271	2	ACAD10	Acyl-CoA dehydrogenase family member 10
ENSG00000111300	3	C12orf30	Uncharacterized
ENSG00000111647	2	NP_001006948.1	UHRF1 binding protein 1-like
ENSG00000112276	1	BVES	Blood vessel epicardial substance
ENSG00000112763	2	BTN2A1	Butyrophilin subfamily 2 member A1 precursor
ENSG00000113522	4	RAD50	DNA repair protein RAD50
ENSG00000113593	1	PPWD1	Peptidylprolyl isomerase domain and WD repeat-containing protein 1
ENSG00000113595	1	TRIM23	GTP-binding protein ARD-1
ENSG00000113597	1	NP_079217.2	C5orf44
ENSG00000114316	2	USP4	Ubiquitin carboxyl-terminal hydrolase 4
ENSG00000114439	2	BBX	HMG box transcription factor BBX
ENSG00000114473	1	IQCG	IQ domain-containing protein G
ENSG00000114487	1	MORC1	MORC family CW-type zinc finger protein 1
ENSG00000115267	4	IFIH1	Interferon-induced helicase C domain-containing protein 1
ENSG00000115414	8	FN1	Fibronectin precursor
ENSG00000115423	4	Q96BL6_HUMAN	CDNA: FLJ23529 fis, clone LNG06042
ENSG00000115592	2	PRKAG3	5'-AMP-activated protein kinase subunit gamma-3
ENSG00000115839	1	RAB3GAP1	Rab3 GTPase-activating protein catalytic subunit
ENSG00000115850	3	LCT	Lactase-phlorizin hydrolase precursor
ENSG00000115866	1	DARS	Aspartyl-tRNA synthetase, cytoplasmic
ENSG00000115970	1	THADA	thyroid adenoma associated
ENSG00000116117	2	PARD3B	par-3 partitioning defective 3 homolog B isoform a
ENSG00000116127	1	ALMS1	Alstrom syndrome protein 1
ENSG00000116544	1	DLGAP3	Disks large-associated protein 3
ENSG00000116678	3	LEPR	Leptin receptor precursor
ENSG00000116793	1	PHTF1	Putative homeodomain transcription factor 1
ENSG00000116819	2	TFAP2E	transcription factor AP-2 epsilon
ENSG00000117477	2	C1orf114	Uncharacterized
ENSG00000118420	1	C6orf157	UBCH10 binding protein with a hect-like domain
ENSG00000118997	20	DNAH7	dynein, axonemal, heavy chain 7
ENSG00000119938	1	PPP1R3C	Protein phosphatase 1 regulatory subunit 3C
ENSG00000120071	1	KIAA1267	Uncharacterized
ENSG00000120159	1	C9orf82	Uncharacterized
ENSG00000121075	1	TBX4	T-box transcription factor TBX4
ENSG00000121270	5	ABCC11	ATP-binding cassette transporter sub-family C member 11
ENSG00000121310	1	ECHDC2	enoyl Coenzyme A hydratase domain containing 2
ENSG00000121390	2	PSPC1	paraspeckle protein 1
ENSG00000121988	1	ZRANB3	Zinc finger Ran-binding domain-containing protein 3
ENSG00000122335	1	SERAC1	Protein SERAC1
ENSG00000122483	4	CCDC18	Coiled-coil domain-containing protein 18
ENSG00000122882	1	ECD	SGT1 protein
ENSG00000123342	1	MMP19	Matrix metalloproteinase-19 precursor
ENSG00000123612	2	ACVR1C	Activin receptor type 1C precursor
ENSG00000124356	2	STAMBP	STAM-binding protein
ENSG00000124508	1	BTN2A2	Butyrophilin subfamily 2 member A2 precursor
ENSG00000124575	1	HIST1H1D	Histone H1.3
ENSG00000125149	1	C16orf70	UPF0183 protein C16orf70
ENSG00000125995	1	C20orf52	Uncharacterized
ENSG00000125998	1	FAM83C	Protein FAM83C
ENSG00000126001	3	CEP250	Centrosome-associated protein CEP250
ENSG00000126067	1	PSMB2	Proteasome subunit beta type 2
ENSG00000126070	1	EIF2C3	Eukaryotic translation initiation factor 2C 3
ENSG00000126653	2	CCDC55	Coiled-coil domain-containing protein 55
ENSG00000126773	2	C14orf135	Uncharacterized protein C14orf135 precursor
ENSG00000127412	2	TRPV5	Transient receptor potential cation channel subfamily V member 5
ENSG00000128563	1	PRKRIP1	PRKR interacting protein 1
ENSG00000128606	2	LRRC17	Leucine-rich repeat-containing protein 17 precursor
ENSG00000128655	4	PDE11A	Dual 3',5'-cyclic-AMP and -GMP phosphodiesterase 11A
ENSG00000128731	1	HERC2	Probable E3 ubiquitin-protein ligase HERC2
ENSG00000128833	9	MYO5C	Myosin-Vc
ENSG00000130429	1	ARPC1B	Actin-related protein 2/3 complex subunit 1B
ENSG00000130943	2	PKDREJ	Polycystic kidney disease and receptor for egg jelly-related protein precursor
ENSG00000131374	1	TBC1D5	TBC1 domain family member 5
ENSG00000131951	5	LRRC9	Leucine-rich repeat-containing protein 9
ENSG00000132669	3	RIN2	Ras and Rab interactor 2
ENSG00000132872	1	SYT4	Synaptotagmin-4
ENSG00000132950	1	ZMYM5	Zinc finger MYM-type protein 5
ENSG00000133115	2	STOML3	Stomatin-like protein 3
ENSG00000134242	2	PTPN22	Tyrosine-protein phosphatase non-receptor type 22
ENSG00000134262	2	AP4B1	AP-4 complex subunit beta-1
ENSG00000134330	1	IAH1	isoamyl acetate-hydrolyzing esterase 1 homolog
ENSG00000134987	4	WDR36	WD repeat protein 36
ENSG00000135074	1	ADAM19	ADAM 19 precursor
ENSG00000135298	1	BAI3	Brain-specific angiogenesis inhibitor 3 precursor
ENSG00000135315	7	KIAA1009	KIAA1009
ENSG00000135404	1	CD63	CD63 antigen
ENSG00000135424	3	ITGA7	Integrin alpha-7 precursor
ENSG00000135437	1	RDH5	11-cis retinol dehydrogenase
ENSG00000135723	2	FHOD1	FH1/FH2 domain-containing protein 1
ENSG00000135740	1	SLC9A5	Sodium/hydrogen exchanger 5
ENSG00000135912	2	TTLL4	Tubulin--tyrosine ligase-like protein 4
ENSG00000135925	2	WNT10A	Protein Wnt-10a precursor
ENSG00000135929	2	CYP27A1	Cytochrome P450 27, mitochondrial precursor
ENSG00000135960	2	EDAR	Tumor necrosis factor receptor superfamily member EDAR precursor
ENSG00000135968	2	GCC2	Ran-binding protein 2-like 4
ENSG00000136021	5	SCYL2	SCY1-like protein 2
ENSG00000136573	1	BLK	Tyrosine-protein kinase BLK
ENSG00000136824	3	SMC2	Structural maintenance of chromosomes protein 2
ENSG00000136839	1	OR13C9	Olfactory receptor 13C9
ENSG00000137473	2	TTC29	tetratricopeptide repeat domain 29
ENSG00000137709	2	POU2F3	POU domain, class 2, transcription factor 3
ENSG00000138036	2	DYNC2LI1	dynein 2 light intermediate chain isoform 1
ENSG00000138095	2	LRPPRC	130 kDa leucine-rich protein
ENSG00000138119	2	FER1L3	Myoferlin
ENSG00000138190	3	EXOC6	Exocyst complex component 6
ENSG00000138279	2	ANXA7	Annexin A7
ENSG00000138286	2	KIAA0974
ENSG00000138363	2	ATIC	Bifunctional purine biosynthesis protein PURH
ENSG00000138411	1	HECW2	E3 ubiquitin-protein ligase HECW2
ENSG00000138430	1	OLA1	Putative GTP-binding protein 9
ENSG00000138613	1	APH1B	Gamma-secretase subunit APH-1B
ENSG00000138688	3	KIAA1109	KIAA1109 (KIAA1109), mRNA
ENSG00000138823	1	MTTP	Microsomal triglyceride transfer protein large subunit precursor
ENSG00000139173	2	TMEM117	Transmembrane protein 117
ENSG00000139324	3	TMTC3	Transmembrane and TPR repeat-containing protein 3
ENSG00000139679	1	P2RY5	P2Y purinoceptor 5
ENSG00000139687	2	RB1	Retinoblastoma-associated protein
ENSG00000139697	3	SBNO1	sno, strawberry notch homolog 1
ENSG00000140451	3	PIF1	DNA helicase homolog PIF1
ENSG00000140455	1	USP3	Ubiquitin carboxyl-terminal hydrolase 3
ENSG00000140488	1	BRUNOL6	bruno-like 6, RNA binding protein
ENSG00000140543	2	DET1	DET1 homolog
ENSG00000140798	5	ABCC12	Multidrug resistance-associated protein 9
ENSG00000141376	1	BCAS3	breast carcinoma amplified sequence 3 isoform 2
ENSG00000142687	1	KIAA0319L	polycystic kidney disease 1-like isoform b
ENSG00000142973	5	CYP4B1	Cytochrome P450 4B1
ENSG00000143033	1	MTF2	Metal-response element-binding transcription factor 2
ENSG00000143217	3	PVRL4	poliovirus receptor-related 4
ENSG00000143224	1	PPOX	Protoporphyrinogen oxidase
ENSG00000143258	1	USP21	Ubiquitin carboxyl-terminal hydrolase 21
ENSG00000143771	1	CNIH4	Cornichon homolog 4
ENSG00000143921	1	ABCG8	ATP-binding cassette sub-family G member 8
ENSG00000144035	1	NAT8B	Probable N-acetyltransferase 8
ENSG00000144036	1	EXOC6B	Exocyst complex component Sec15B
ENSG00000144395	1	NP_001074008.1	Coiled-coil domain containing 150
ENSG00000144476	1	CXCR7	C-X-C chemokine receptor type 7
ENSG00000145012	1	LPP	Lipoma-preferred partner
ENSG00000145331	1	RG9MTD2	RNA (guanine-9-) methyltransferase domain containing 2
ENSG00000145819	1	ARHGAP26	Rho GTPase-activating protein 26
ENSG00000146109	1	ABT1	Activator of basal transcription 1
ENSG00000146463	1	ZMYM4	zinc finger protein 262
ENSG00000146802	2	TMEM168	Transmembrane protein 168
ENSG00000146839	6	ZAN	Zonadhesin precursor
ENSG00000147573	1	TRIM55	Tripartite motif-containing protein 55
ENSG00000147724	1	FAM135B	C8ORFK32 protein
ENSG00000148481	1	C10orf97	CDNA FLJ13397 fis, clone PLACE1001351
ENSG00000148516	1	ZEB1	Zinc finger E-box-binding homeobox 1
ENSG00000149646	1	C20orf152	Uncharacterized
ENSG00000150625	1	GPM6A	Neuronal membrane glycoprotein M6-a
ENSG00000150867	1	PIP4K2A	Phosphatidylinositol-4-phosphate 5-kinase type-2 alpha
ENSG00000150893	17	FREM2	FRAS1-related extracellular matrix protein 2 precursor
ENSG00000151092	2	NGLY1	Peptide-N(4)-(N-acetyl-beta-glucosaminyl)asparagine amidase
ENSG00000151445	2	C14orf133	Uncharacterized
ENSG00000151694	1	ADAM17	ADAM 17 precursor
ENSG00000152127	1	MGAT5	Alpha-1,6-mannosylglycoprotein 6-beta-N-acetylglucosaminyltransferase A
ENSG00000152527	3	PLEKHH2	pleckstrin homology domain containing, family H
ENSG00000152785	1	BMP3	Bone morphogenetic protein 3 precursor
ENSG00000153936	1	HS2ST1	Heparan sulfate 2-O-sulfotransferase 1
ENSG00000154162	4	CDH12	Cadherin-12 precursor
ENSG00000154240	3	CCDC46	Coiled-coil domain-containing protein 46
ENSG00000154316	6	TDH	L-threonine dehydrogenase (TDH) on chromosome 8
ENSG00000155313	1	USP25	Ubiquitin carboxyl-terminal hydrolase 25
ENSG00000156042	1	TTC18	Tetratricopeptide repeat protein 18
ENSG00000156162	1	DPY19L4	dpy-19-like 4
ENSG00000156687	2	UNC5D	Netrin receptor UNC5D precursor
ENSG00000156858	1	PRR14	proline rich 14
ENSG00000157680	1	DGKI	Diacylglycerol kinase iota
ENSG00000157827	1	FMNL2	Formin-like protein 2
ENSG00000158234	2	FAIM	Fas apoptotic inhibitory molecule 1
ENSG00000158793	2	NIT1	Nitrilase homolog 1
ENSG00000158864	1	NDUFS2	NADH dehydrogenase [ubiquinone] iron-sulfur protein 2, mitochondrial precursor
ENSG00000159658	3	KIAA0494	Uncharacterized calcium-binding protein KIAA0494
ENSG00000159708	2	LRRC36	Leucine-rich repeat-containing protein 36
ENSG00000159713	2	TPPP3	Tubulin polymerization-promoting protein family member 3
ENSG00000159714	2	ZDHHC1	Probable palmitoyltransferase ZDHHC1
ENSG00000159753	2	NP_001013860.1	RGD, leucine-rich repeat, tropomodulin and proline-rich containing protein
ENSG00000160746	3	TMEM16K	Transmembrane protein 16K
ENSG00000160870	1	CYP3A7	Cytochrome P450 3A7
ENSG00000160999	2	SH2B2	SH2B adapter protein 2
ENSG00000161040	4	FBXL13	F-box/LRR-repeat protein 13
ENSG00000162144	1	CYBASC3	cytochrome b, ascorbate dependent 3
ENSG00000162365	6	CYP4A22	cytochrome P450, family 4, subfamily A, polypeptide 22
ENSG00000162377	1	C1orf163	Hcp beta-lactamase-like protein C1orf163
ENSG00000162383	3	SLC1A7	Excitatory amino acid transporter 5
ENSG00000162923	2	WDR26	WD repeat protein 26
ENSG00000163017	1	ACTG2	Actin, gamma-enteric smooth muscle
ENSG00000163029	1	SMC6	Structural maintenance of chromosomes protein 6
ENSG00000163092	13	XIRP2	cardiomyopathy associated 3 isoform 1
ENSG00000163541	1	SUCLG1	Succinyl-CoA ligase [GDP-forming] subunit alpha, mitochondrial precursor
ENSG00000163788	2	SNRK	SNF-related serine/threonine-protein kinase
ENSG00000163867	2	ZMYM6	Zinc finger MYM-type protein 6
ENSG00000164024	1	METAP1	Methionine aminopeptidase 1
ENSG00000164061	5	BSN	Protein bassoon
ENSG00000164062	1	APEH	Acylamino-acid-releasing enzyme
ENSG00000164068	3	RNF123	E3 ubiquitin-protein ligase RNF123
ENSG00000164169	3	NP_612373.2	Protein arginine methyltransferase 10 (putative)
ENSG00000164209	1	SLC25A46	Solute carrier family 25 member 46
ENSG00000164402	1	SEPT8	Septin-8
ENSG00000164404	2	GDF9	Growth/differentiation factor 9 precursor
ENSG00000164659	5	KIAA1324L	Protein KIAA1324-like
ENSG00000164933	2	SLC25A32	Mitochondrial folate transporter/carrier
ENSG00000164934	1	WDSOF1	WD repeats and SOF1 domain containing
ENSG00000164941	1	INTS8	Integrator complex subunit 8
ENSG00000165028	3	NIPSNAP3B	Protein NipSnap3B
ENSG00000165309	1	ARMC3	Armadillo repeat-containing protein 3
ENSG00000165553	1	NGB	Neuroglobin
ENSG00000165805	1	C12orf50	CDNA FLJ35821 fis, clone TESTI2006218
ENSG00000166123	1	GPT2	Alanine aminotransferase 2
ENSG00000166128	1	RAB8B	Ras-related protein Rab-8B
ENSG00000166147	4	FBN1	Fibrillin-1 precursor
ENSG00000166317	3	SYNPO2L	Synaptopodin 2-like protein
ENSG00000166343	1	ZMYND17	Zinc finger MYND domain-containing protein 17
ENSG00000166477	1	LEO1	RNA polymerase-associated protein LEO1
ENSG00000166839	1	ANKDD1A	Ankyrin repeat and death domain-containing protein 1A precursor
ENSG00000167791	1	CABP2	Calcium-binding protein 2
ENSG00000167797	2	CDK2AP2	Cyclin-dependent kinase 2-associated protein 2
ENSG00000167822	4	OR8J3	Olfactory receptor 8J3
ENSG00000167825	2	OR5I1	Olfactory receptor 5I1
ENSG00000167987	1	VPS37C	vacuolar protein sorting 37C
ENSG00000167992	1	VWCE	von Willebrand factor C and EGF domains
ENSG00000168300	1	PCMTD1	Protein-L-isoaspartate O-methyltransferase domain-containing protein 1
ENSG00000169436	2	COL22A1	collagen, type XXII, alpha 1
ENSG00000169957	1	ZNF768	zinc finger protein 768
ENSG00000170439	1	METTL7B	Methyltransferase-like protein 7B precursor
ENSG00000170482	3	SLC23A1	Solute carrier family 23 member 1
ENSG00000170605	1	OR9K2	Olfactory receptor 9K2
ENSG00000170745	1	KCNS3	Potassium voltage-gated channel subfamily S member 3
ENSG00000170832	1	USP32	Ubiquitin carboxyl-terminal hydrolase 32
ENSG00000171208	1	NETO2	Neuropilin and tolloid-like protein 2 precursor
ENSG00000171444	3	MCC	Colorectal mutant cancer protein
ENSG00000171497	1	PPID	40 kDa peptidyl-prolyl cis-trans isomerase
ENSG00000171509	3	RXFP1	Relaxin receptor 1
ENSG00000171723	1	GPHN	Gephyrin
ENSG00000171790	1	SLFNL1	Schlafen-like protein 1
ENSG00000171812	1	COL8A2	Collagen alpha-2(VIII) chain precursor
ENSG00000172154	1	OR8I2	Olfactory receptor 8I2
ENSG00000172260	1	NEGR1	Neuronal growth regulator 1 precursor
ENSG00000172489	3	OR5T3	Olfactory receptor 5T3
ENSG00000172508	1	NP_065862.1	Carnosine synthase 1
ENSG00000172568	1	C5orf40	MGC27121 gene
ENSG00000172725	1	CORO1B	Coronin-1B
ENSG00000172845	1	SP3	Transcription factor Sp3
ENSG00000173064	1	C12orf51	Uncharacterized
ENSG00000173093	2	CCDC63	Coiled-coil domain-containing protein 63
ENSG00000173250	2	GPR151	Probable G-protein coupled receptor 151
ENSG00000173402	2	DAG1	Dystroglycan precursor
ENSG00000173482	1	PTPRM	Receptor-type tyrosine-protein phosphatase mu precursor
ENSG00000173636	1	PRSS1	Trypsin-1 precursor
ENSG00000173867	1	MRPL46	39S ribosomal protein L46, mitochondrial precursor
ENSG00000173905	1	GOLIM4	Golgi phosphoprotein 4
ENSG00000174175	1	SELP	P-selectin precursor
ENSG00000174348	2	PODN	Podocan precursor
ENSG00000174842	1	GLMN	Glomulin
ENSG00000174957	1	OR5J2	Olfactory receptor 5J2
ENSG00000175073	1	VCPIP1	Deubiquitinating protein VCIP135
ENSG00000175305	1	CCNE2	G1/S-specific cyclin-E2
ENSG00000175318	1	GRAMD2	GRAM domain-containing protein 2
ENSG00000175398	1	OR10P1	Olfactory receptor 10P1
ENSG00000175634	3	RPS6KB2	Ribosomal protein S6 kinase beta-2
ENSG00000176225	1	RTTN	rotatin
ENSG00000176607	1	OR2AE1	Olfactory receptor 2AE1
ENSG00000176927	1	EFCAB5	EF-hand calcium binding domain 5
ENSG00000177735	1	NP_775916.1	CDNA FLJ37357 fis, clone BRAMY2023060
ENSG00000178295	1	NP_872431.2	Gen homolog 1, endonuclease
ENSG00000178460	6	C8orf45	Uncharacterized
ENSG00000179041	3	RRS1	Ribosome biogenesis regulatory protein homolog
ENSG00000179044	2	EXOC3L	exocyst complex component 3-like
ENSG00000179055	2	OR13D1	Olfactory receptor 13D1
ENSG00000179364	2	PACS2	Phosphofurin acidic cluster sorting protein 2
ENSG00000179454	3	KLHL28	Kelch-like protein 28
ENSG00000179468	1	OR9A2	Olfactory receptor 9A2
ENSG00000179476	1	C14orf28	Uncharacterized
ENSG00000179615	3	OR2AP1	Olfactory receptor 2AP1
ENSG00000179626	1	OR6C4	Olfactory receptor 6C4
ENSG00000179695	4	OR6C2	Olfactory receptor 6C2
ENSG00000179772	1	FKHL18	Forkhead-related transcription factor 10
ENSG00000179918	1	SEPHS2	Selenide, water dikinase 2
ENSG00000180068	5	OR3A4	Olfactory receptor 3A4
ENSG00000180090	2	OR3A1	Olfactory receptor 3A1
ENSG00000180891	3	CUEDC1	CUE domain-containing protein 1
ENSG00000181359	1	HSP90AA6P	Heat shock protein 90Af
ENSG00000181718	3	OR5T2	Olfactory receptor 5T2
ENSG00000181723	2	Q8NGG1_HUMAN	Seven transmembrane helix receptor
ENSG00000181752	1	OR8K5	Olfactory receptor 8K5
ENSG00000181761	3	OR8H3	Olfactory receptor 8H3
ENSG00000181767	1	OR8H2	Olfactory receptor 8H2
ENSG00000181780	1	Q8N164_HUMAN	Seven transmembrane helix receptor
ENSG00000181837	4	Q8NGL5_HUMAN	Seven transmembrane helix receptor
ENSG00000182180	2	MRPS16	28S ribosomal protein S16, mitochondrial precursor
ENSG00000184232	2	OAF	Out at first protein homolog precursor
ENSG00000184408	1	KCND2	Potassium voltage-gated channel subfamily D member 2
ENSG00000184432	3	COPB2	Coatomer subunit beta'
ENSG00000184584	3	TMEM173	Transmembrane protein 173
ENSG00000184708	1	EIF4ENIF1	Eukaryotic translation initiation factor 4E transporter
ENSG00000184838	1	PRR16	proline rich 16
ENSG00000184954	2	OR6C70	olfactory receptor, family 6, subfamily C, member 70
ENSG00000185024	1	BRF1	Transcription factor IIIB 90 kDa subunit
ENSG00000185046	1	ANKS1B	cajalin 2 isoform a
ENSG00000185104	1	FAF1	FAS-associated factor 1
ENSG00000185483	1	ROR1	Tyrosine-protein kinase transmembrane receptor ROR1 precursor
ENSG00000185518	4	SV2B	Synaptic vesicle glycoprotein 2B
ENSG00000185697	1	MYBL1	Myb-related protein A
ENSG00000185721	1	DRG1	Developmentally-regulated GTP-binding protein 1
ENSG00000185821	2	OR6C76	olfactory receptor, family 6, subfamily C, member 76
ENSG00000185873	1	TMPRSS11B	transmembrane protease, serine 11B
ENSG00000186113	2	OR5D14	Olfactory receptor 5D14
ENSG00000186117	2	OR5L1	Olfactory receptor 5L1
ENSG00000186153	5	WWOX	WW domain-containing oxidoreductase
ENSG00000186854	1	Q86V40_HUMAN
ENSG00000186881	2	OR13F1	Olfactory receptor 13F1
ENSG00000187510	1	NP_001004330.1	pleckstrin homology domain containing, family G, member 7
ENSG00000187612	2	OR5W2	Olfactory receptor 5W2
ENSG00000187758	1	ADH1A	Alcohol dehydrogenase 1A
ENSG00000187790	1	FANCM	Fanconi anemia group M protein
ENSG00000188324	1	OR6C6	olfactory receptor, family 6, subfamily C, member 6
ENSG00000188342	1	GTF2F2	Transcription initiation factor IIF subunit beta
ENSG00000188467	1	SLC24A5	Sodium/potassium/calcium exchanger 5 precursor
ENSG00000188559	3	C20orf74	250 kDa substrate of Akt
ENSG00000188687	2	SLC4A5	sodium bicarbonate transporter 4 isoform c
ENSG00000188712	1	Q8NHB3_HUMAN	Seven transmembrane helix receptor
ENSG00000188848	1	CCDC4	Coiled-coil domain-containing protein 4
ENSG00000188993	1	NP_001019782.1	Leucine rich repeat containing 66
ENSG00000196199	1	MPHOSPH8	M-phase phosphoprotein 8
ENSG00000196411	2	EPHB4	Ephrin type-B receptor 4 precursor
ENSG00000196455	3	PIK3R4	Phosphoinositide 3-kinase regulatory subunit 4
ENSG00000196470	1	SIAH1	E3 ubiquitin-protein ligase SIAH1
ENSG00000196534	2	Q8NGE6_HUMAN	Seven transmembrane helix receptor
ENSG00000196616	1	ADH1C	Alcohol dehydrogenase 1B
ENSG00000196659	3	TTC30B	tetratricopeptide repeat domain 30B
ENSG00000197037	2	ZNF498	zinc finger and SCAN domain containing 25
ENSG00000197343	1	ZNF655	Zinc finger protein 655
ENSG00000197361	1	FBXL22	F-box/LRR-repeat protein 22
ENSG00000197535	4	MYO5A	Myosin-Va
ENSG00000197557	2	TTC30A	tetratricopeptide repeat domain 30A
ENSG00000197706	7	OR6C74	olfactory receptor, family 6, subfamily C, member 74
ENSG00000197993	1	KEL	Kell blood group glycoprotein
ENSG00000198075	1	SULT1C4	Sulfotransferase 1C2
ENSG00000198327	1	H4_HUMAN	Histone H4
ENSG00000198589	4	LRBA	Lipopolysaccharide-responsive and beige-like anchor protein
ENSG00000198707	5	CEP290	Centrosomal protein Cep290
ENSG00000198718	2	KIAA0423	Uncharacterized
ENSG00000198734	4	F5	Coagulation factor V precursor
ENSG00000198822	1	GRM3	Metabotropic glutamate receptor 3 precursor
ENSG00000203737	2	GPR52	Probable G-protein coupled receptor 52
ENSG00000203837	1	PNLIPRP3	Pancreatic lipase-related protein 3 precursor
ENSG00000203995	3	ZYG11A	Zyg-11 homolog A
ENSG00000204246	2	OR13C3	Olfactory receptor 13C3
ENSG00000204381	2	LAYN	Layilin precursor
ENSG00000204842	2	ATXN2	Ataxin-2
ENSG00000204982	1	PRSS2	Trypsin-2 precursor
ENSG00000204983	1	NR_001296.2	trypsinogen C (TRY6) on chromosome 7
ENSG00000205030	2	OR5L2	Olfactory receptor 5L2
ENSG00000205111	3	CDKL4	Cyclin-dependent kinase-like 4
ENSG00000205268	1	PDE7A	High-affinity cAMP-specific 3',5'-cyclic phosphodiesterase 7A
ENSG00000205327	1	OR6C68	olfactory receptor, family 6, subfamily C, member 68
ENSG00000205329	2	OR6C3	Olfactory receptor 6C3
ENSG00000205330	4	OR6C1	Olfactory receptor 6C1
ENSG00000205442	1	C9orf134
ENSG00000206422	2	LRRC30
ENSG00000213551	1	DNAJC9	DnaJ homolog subfamily C member 9
ENSG00000214078	5	CPNE1	Copine-1
The hitchhiking regions are defined by the overlap of three or more tests of selection.
